# Supplementary material
Source: ML conference proceedings conference paper supplement (https://proceedings.neurips.cc/paper_files/paper/2016/hash/2d405b367158e3f12d7c1e31a96b3af3-Abstract.html)
Supplement: Supplementary file 1 [file 2d405b367158e3f12d7c1e31a96b3af3-Supplemental.zip]

Archive with 1 entries (1 files):
- supp.pdf
